# Supplementary material for: MHC-restricted phosphopeptide antigens: preclinical validation and first-in-humans clinical trial in participants with high-risk melanoma
Source: PubMed Central journal article supplement — J Immunother Cancer. 2020 May 7;8(1):e000262. doi: 10.1136/jitc-2019-000262 (PMC7228659; doi:10.1136/jitc-2019-000262), 2020-05-07
Supplement: jitc-2019-000262supp001.pdf [file jitc-2019-000262supp001.pdf]

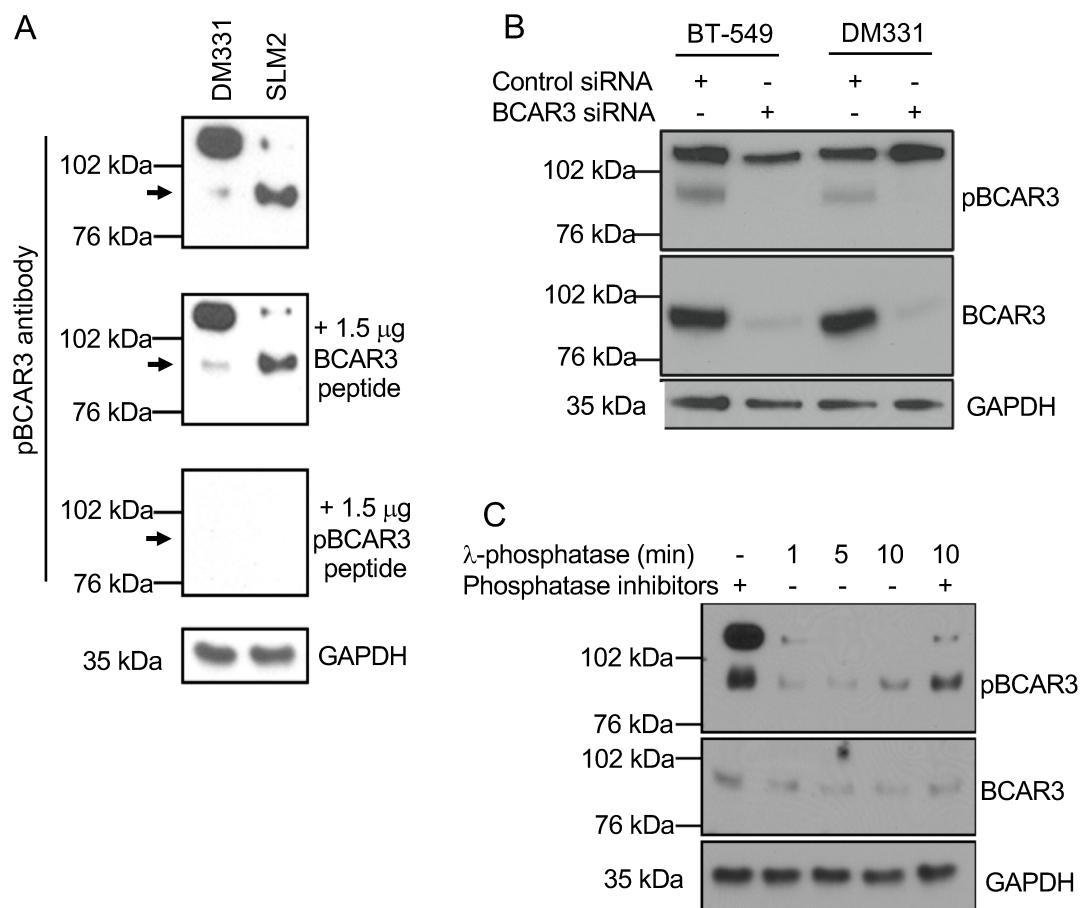

**Supplemental Figure 1. Specificity of anti-phosphoT130-BCAR3 antibody.** (A) Detection of whole protein by an affinity purified antibody raised against an epitope spanning amino acids 123 – 135 of BCAR3 and phosphorylated at T130 (phospho<sub>T130</sub>-BCAR3 antibody) was assessed by Western blot. Excess amounts of the unphosphorylated peptide or the immunizing phosphopeptide were added during overnight incubation to compete for antibody binding. (B) Protein lysates from cells in which BCAR3 had been knocked down by siRNA for 48hrs were probed with the phospho<sub>T130</sub>-BCAR3 antibody and a BCAR3 antibody. GAPDH expression served as a loading control. Results are representative of two independent experiments. (C) Verification that the phospho-BCAR3 antibody detects phosphorylated proteins was carried out using protein lysates from DM331 were incubated with purified λ-phosphatase over several minutes. GAPDH expression served as a loading control. Results are representative of 2 independent experiments.

#### Supplemental Methods

**siRNA knockdown of BCAR3.** 600pmol of small interfering RNA oligonucleotide against human BCAR3 (AAAUCAACCGGACAGUUCU, Dharmacon) or silencer negative control #1 siRNA (cat# AM4611, Ambion) was diluted in 2ml of Opti-MEM I media (cat# 31985-062, Invitrogen) in 100mm culture dishes. 35µl of Lipofectamine RNAiMAX (cat# 13778, Invitrogen) was added to the culture dish and mixed gently. The culture dish was incubated at room temperature for 20 min. Breast cancer cell line BT-549 or melanoma cell line DM331 cells ( $3 - 5 \times 10^5$ ) were resuspended in 10ml of growth media with antibiotics, added to the culture dish, and incubated at 37°C for 48 h. The cells were then harvested for Western analysis.
