# Supplementary material for: MHC-restricted phosphopeptide antigens: preclinical validation and first-in-humans clinical trial in participants with high-risk melanoma
Source: PubMed Central journal article supplement — J Immunother Cancer. 2020 May 7;8(1):e000262. doi: 10.1136/jitc-2019-000262 (PMC7228659; doi:10.1136/jitc-2019-000262), 2020-05-07
Supplement: jitc-2019-000262supp002.pdf [file jitc-2019-000262supp002.pdf]

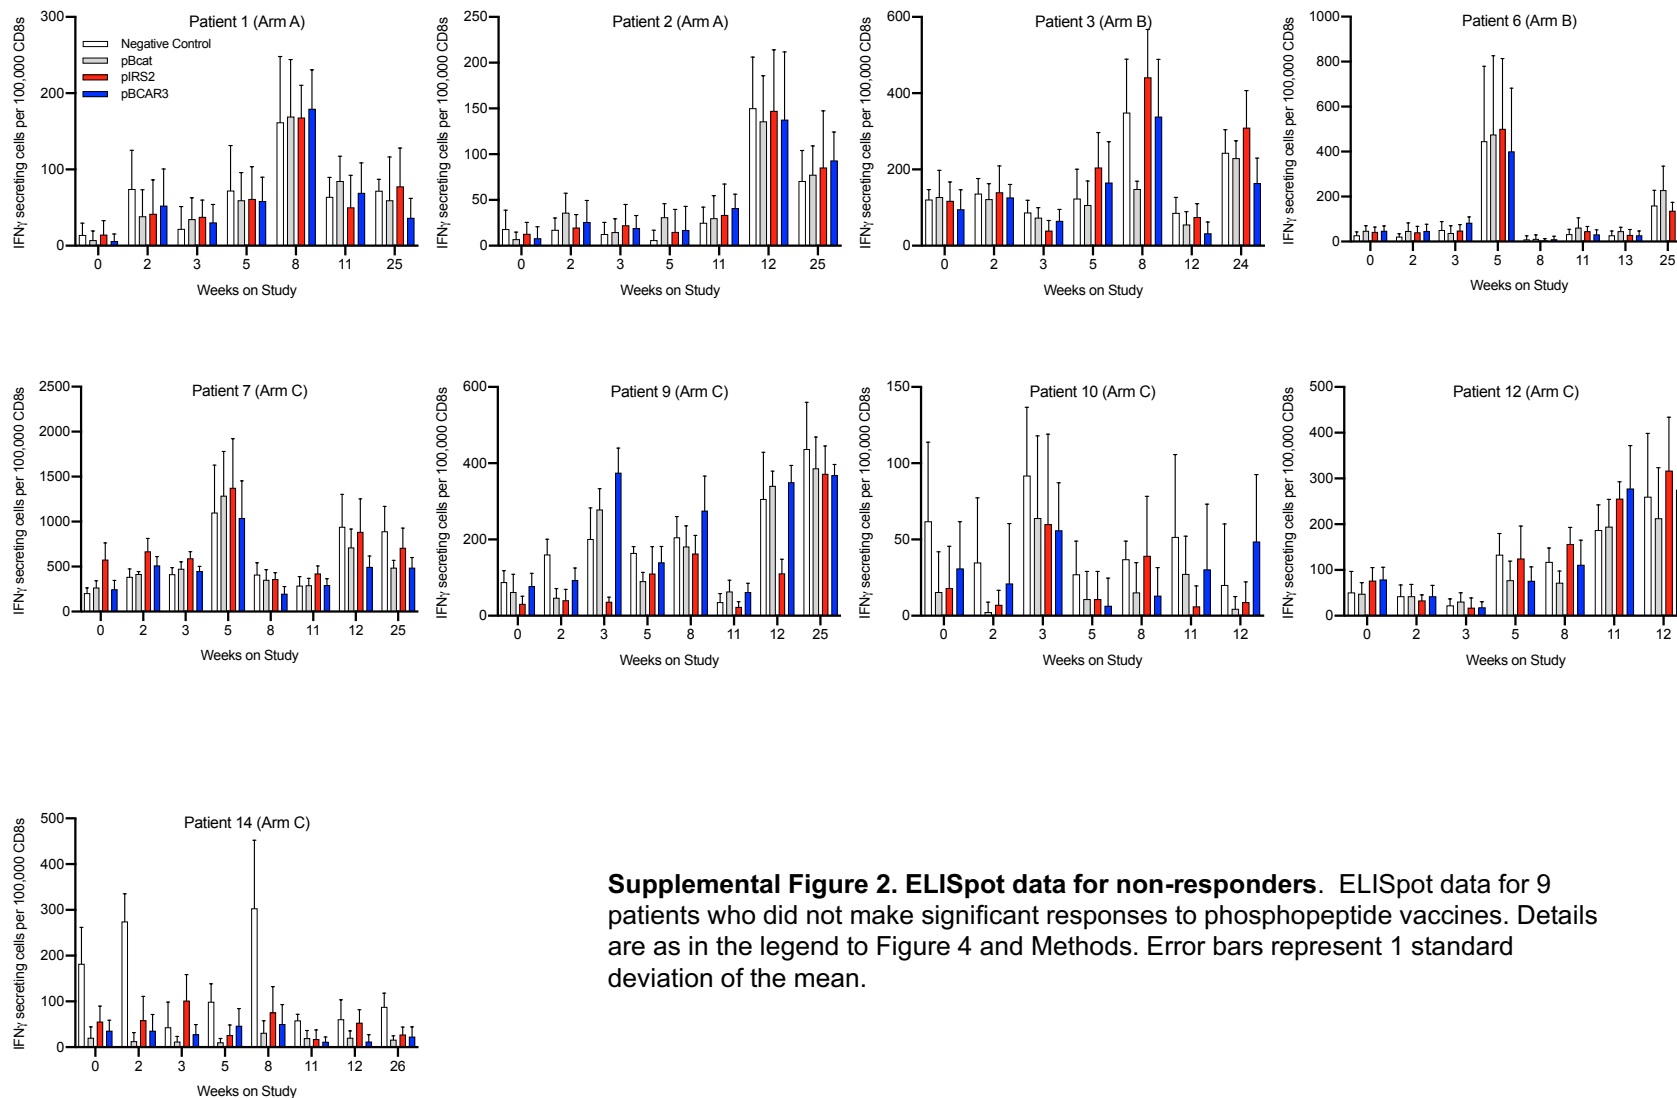

**Supplemental Figure 2. ELISpot data for non-responders.** ELISpot data for 9 patients who did not make significant responses to phosphopeptide vaccines. Details are as in the legend to Figure 4 and Methods. Error bars represent 1 standard deviation of the mean.

Supplemental Figure 2
